# Supplementary material for: Clinical Characteristics and Risk Factors for Severe Outcomes of Novel Coronavirus Infection, January–March 2020, Japan
Source: PubMed Central journal article supplement (PMC8275442; doi:10.2188/jea.je20200519), 2021-08-05
Supplement: je-31-487-s001.pdf [file je-31-487-s001.pdf]

**eTable 1.** Comparison between subjects in this study vs. cases notified through the NESID system that could not be linked to follow-up data (i.e., cases not included in this study)

|                                      |                  | Subjects in this study<br>(n=516) | Cases notified through NESID that could not<br>be linked to follow-up data (n=1,138) | p-value |
|--------------------------------------|------------------|-----------------------------------|--------------------------------------------------------------------------------------|---------|
|                                      |                  | n (%)                             | n (%)                                                                                |         |
| Gender                               | Male             | 285 (55.2%)                       | 615 (54.0%)                                                                          | 0.69    |
|                                      | Female           | 231 (44.8%)                       | 523 (46.0%)                                                                          |         |
| Age, years                           | ≥60              | 263 (51.0%)                       | 579 (50.9%)                                                                          | 0.98    |
|                                      | 0–59             | 253 (49.0%)                       | 559 (49.1%)                                                                          |         |
| Sign/symptom<br>at time of diagnosis | fever            | 323 (62.6%)                       | 706 (62.0%)                                                                          | 0.87    |
|                                      | cough            | 226 (43.8%)                       | 420 (36.9%)                                                                          |         |
|                                      | severe pneumonia | 33 (6.4%)                         | 90 (7.9%)                                                                            | 0.32    |

NESID, National Epidemiological Surveillance of Infectious Diseases.
